# Supplementary material for: Serum folate deficiency and the risks of dementia and all-cause mortality: a national study of old age
Source: HighWire-hosted journal article supplement (doi:10.1136/ebmental-2021-300309), 2022-03-15
Supplement: ebmental-2021-300309supp001_data_supplement.pdf [file ebmental-2021-300309supp001_data_supplement.pdf]

## **Serum Folate Deficiency and the Risks of Dementia and All-Cause Mortality:**

### **A National Study of Old Age**

#### Table of Contents

|                                                                                                                               |   |
|-------------------------------------------------------------------------------------------------------------------------------|---|
| Supplement Figure 1: Study flow diagram .....                                                                                 | 2 |
| Supplement Figure 2: Illustration of the examination of reverse causation .....                                               | 3 |
| Supplement Table 1: ICD codes for covariate diagnoses .....                                                                   | 4 |
| Supplement Table 2: The incidence of dementia and all-cause mortality per 10,000 person-years (95% confidence interval) ..... | 5 |
| Supplement Table 3: Test of the proportional hazards assumption .....                                                         | 6 |
| Supplement Table 4: The primary analysis .....                                                                                | 7 |
| Supplement Table 5: Sensitivity analyses examining reverse causation .....                                                    | 8 |
| Supplement Table 6: Sensitivity analyses examining the effects of possible modifiers .....                                    | 9 |

## Supplement Figure 1: Study flow diagram

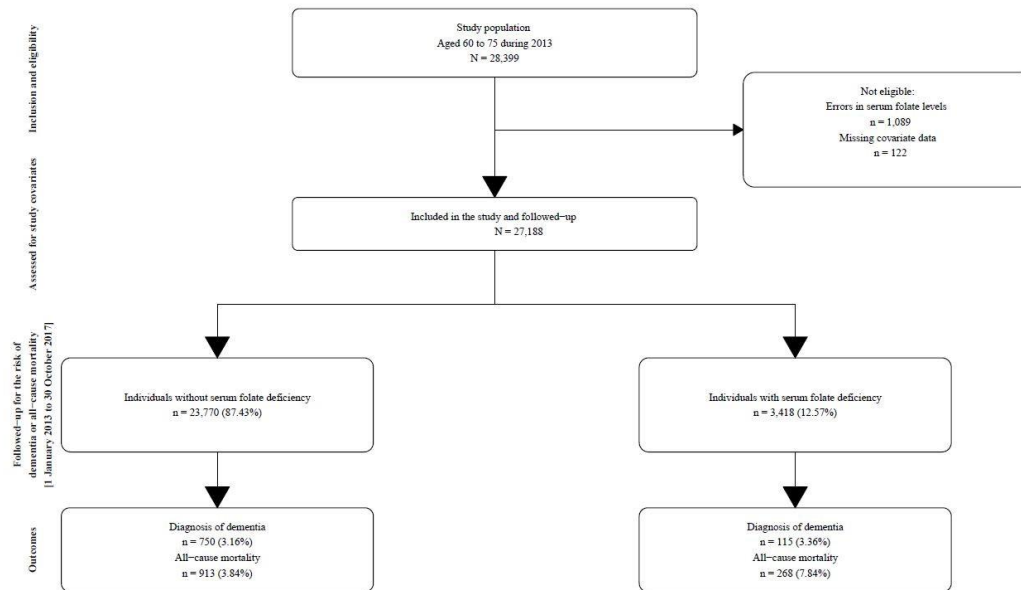

**Supplement Figure 2: Illustration of the examination of reverse causation**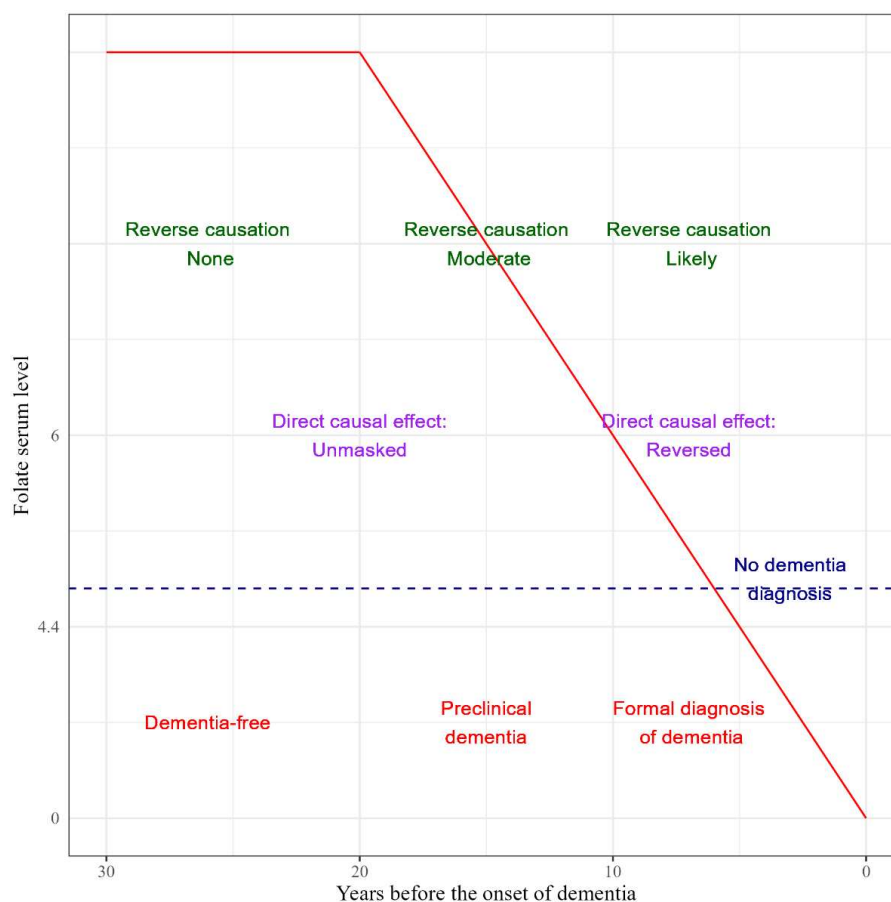

Note.

This figure was adapted from Kivimäki, et al.<sup>1</sup>

To examine reverse causation, the analysis was stratified by duration of follow-up. Based on the median follow-up cut point, the associations between serum folate deficiency and dementia or all-cause mortality were scrutinized in the first then second half of follow-up. Serum folate deficiency was assumed to be little affected by preclinical dementia when the assessment was long before dementia onset and considerably affected when the assessment was nearer the diagnosis. Therefore, a stronger association in the first half of follow-up time may suggest that reverse causation is likely.

1. Kivimäki M, Luukkonen R, Batty GD, et al. Body mass index and risk of dementia: analysis of individual-level data from 1.3 million individuals. *Alzheimer's & Dementia* 2018;14(5):601-09.

**Supplement Table 1: ICD codes for covariate diagnoses**

| Health condition classification | ICD codes                                                                                                                                                                                                                                                                                                                                                                                                                                                                                                                                                                                                                                                                                                       |
|---------------------------------|-----------------------------------------------------------------------------------------------------------------------------------------------------------------------------------------------------------------------------------------------------------------------------------------------------------------------------------------------------------------------------------------------------------------------------------------------------------------------------------------------------------------------------------------------------------------------------------------------------------------------------------------------------------------------------------------------------------------|
| Cognitive decline               | ICD-9: 331.83, 780.93, 438.0, 294.9, 799.5x ,<br>ICD-10: G31.84, R41.81, R41.82, G31.9, F06.8, F06.7                                                                                                                                                                                                                                                                                                                                                                                                                                                                                                                                                                                                            |
| Type II diabetes                | ICD-9: 250.6, 250.5, 250.7, 250, 250.1, 250.4, 250.9,<br>362.01, 275, 250.2, 250.3, 648, 250.8, 251.3, 250.03,<br>250.02, 250.01, 366.41, 713.5, 362, 648.8, 250.61, 250.51,<br>337.1, 357.2, 790.29, 362.02, 362.29, 362.1<br><br>ICD-10: E11, E11.0X, E11.00, E11.01, E11.2X, E11.21,<br>E11.22, E11.29, E11.3X, E11.31, E11.311, E11.319,<br>E11.32, E11.321, E11.329, E11.33, E11.331, E11.339,<br>E11.34, E11.341, E11.349, E11.36, E11.39, E11.4X,<br>E11.40, E11.41, E11.42, E11.45, E11.49, E11.5X, E11.51,<br>E11.52, E11.59, E11.6X, E11.61, E11.610, E11.618,<br>E11.62, E11.620, E11.621, 11.622, E11.628, E11.63,<br>E11.630, E11.638, E11.64, E11.641, E11.649, E11.65,<br>E11.69, E11.8X, E11.9X |
| Depression                      | ICD-9: 296.1, 296.2, 296.22, 296.23, 296.24, 296.25,<br>296.26, 296.3, 296.31, 296.32, 296.33, 296.34, 296.35,<br>300.4,                                                                                                                                                                                                                                                                                                                                                                                                                                                                                                                                                                                        |

**Supplement Table 2: The incidence of dementia and all-cause mortality per 10,000 person-years (95% confidence interval)**

| Covariate               | Classification       | Dementia             | All-cause mortality  |
|-------------------------|----------------------|----------------------|----------------------|
| Sex                     | Female               | 4.42 (3.24, 5.88)    | 4.76 (3.54, 6.27)    |
|                         | Male                 | 4.49 (3.17, 6.17)    | 7.91 (6.11, 10.05)   |
| Smoking status          | Non-smoker           | 4.44 (3.48, 5.58)    | 5.74 (4.64, 7.01)    |
|                         | Smoker               | 4.48 (2.24, 8.01)    | 8.87 (5.55, 13.44)   |
| Vitamin B12 deficiency  | Absent               | 3.93 (0.09, 22.35)   | 4.93 (0.22, 24.08)   |
|                         | Present <sup>1</sup> | 4.46 (3.55, 5.52)    | 6.16 (5.09, 7.39)    |
| Folic acid supplements  | Absent               | 4.26 (3.32, 5.38)    | 5.38 (4.31, 6.62)    |
|                         | Present <sup>1</sup> | 5.64 (3.14, 9.35)    | 10.96 (7.32, 15.78)  |
| Type II diabetes        | Absent               | 3.82 (2.83, 5.04)    | 4.52 (3.44, 5.84)    |
|                         | Present <sup>1</sup> | 5.83 (4.05, 8.11)    | 9.68 (7.34, 12.51)   |
| Depression              | Absent               | 4.16 (3.27, 5.21)    | 6.09 (5.00, 7.34)    |
|                         | Present <sup>1</sup> | 10.34 (4.79, 19.49)  | 7.29 (2.81, 15.41)   |
| Cognitive decline       | Absent               | 2.62 (1.92, 3.50)    | 5.85 (4.78, 7.10)    |
|                         | Present <sup>1</sup> | 29.33 (20.76, 40.26) | 10.10 (5.39, 17.24)  |
| Serum folate deficiency | Absent               | 4.24 (3.34, 5.30)    | 5.36 (4.34, 6.54)    |
|                         | Present <sup>1</sup> | 7.96 (3.56, 15.32)   | 19.20 (11.84, 29.43) |

Note.

<sup>1</sup>Presence at any time point during the follow-up.

**Supplement Table 3: Test of the proportional hazards assumption**

|                         | Dementia   |         | All-cause mortality |         |
|-------------------------|------------|---------|---------------------|---------|
|                         | Chi-square | P-value | Chi-square          | P-value |
| Birth year              | 0.04       | 0.84    | 0.004               | 0.95    |
| Sex                     | 0.36       | 0.55    | 0.0006              | 0.98    |
| Smoking status          | 0.19       | 0.66    | 0.00001             | 0.99    |
| Vitamin B12 deficiency  | 0.48       | 0.49    | 0.12                | 0.72    |
| Folic acid supplements  | 0.02       | 0.89    | 0.22                | 0.64    |
| Type II diabetes        | 0.54       | 0.46    | 0.35                | 0.56    |
| Depression              | 0.56       | 0.45    | 0.09                | 0.77    |
| Cognitive decline       | 1.24       | 0.27    | 0.96                | 0.33    |
| Serum folate deficiency | 0.82       | 0.37    | 0.01                | 0.90    |

Note.

All Chi-square values have DF = 1.

Non-significant values indicate that there was no significant departure from the proportional hazards assumption.

**Supplement Table 4: The primary analysis**

The competing Cox model of the associations between all study covariates and the risks of dementia and all-cause mortality

| Covariate \ Outcome     | Dementia |               |         | All-cause mortality |              |         |
|-------------------------|----------|---------------|---------|---------------------|--------------|---------|
|                         | HR       | 95 % CI       | P-Value | HR                  | 95 % CI      | P-Value |
| Birth year              | 0.86     | (0.81, 0.91)  | <0.001  | 0.88                | (0.83, 0.92) | <0.001  |
| Sex                     | 0.92     | (0.80, 1.06)  | 0.24    | 0.69                | (0.61, 0.77) | <0.001  |
| Smoking status          | 1.14     | (0.93, 1.40)  | 0.21    | 1.38                | (1.18, 1.61) | <0.001  |
| Vitamin B12 deficiency  | 1.01     | (0.55, 1.88)  | 0.96    | 1.44                | (0.81, 2.55) | 0.21    |
| Folic acid supplements  | 0.92     | (0.77, 1.12)  | 0.41    | 1.47                | (1.28, 1.70) | <0.001  |
| Type II diabetes        | 1.28     | (1.11, 1.48)  | <0.001  | 1.89                | (1.68, 2.13) | <0.001  |
| Depression              | 1.63     | (1.29, 2.06)  | <0.001  | 1.10                | (0.85, 1.43) | 0.47    |
| Cognitive decline       | 9.65     | (8.32, 11.18) | <0.001  | 1.53                | (1.27, 1.85) | <0.001  |
| Serum folate deficiency | 1.68     | (1.32, 2.13)  | <0.001  | 2.98                | (2.52, 3.52) | <0.001  |

Note.

Abbreviations: HR: Hazard Ratio from the Cox regression model, CI: Wald two-sided 95% confidence interval, P-Value: p-value for the test of the hypothesis HR=1 vs. the hypothesis HR≠1.

The HR quantifies the risk of a specific event (i.e., all-cause mortality or dementia) as a function of a study covariate (e.g., with vs. without serum folate deficiency). For example, this table shows that serum folate deficiency was associated with a 1.68-fold increased risk of dementia, and a 2.98-fold increased risk of all-cause mortality.

Sex reference group = Male; non-reference group = Female; Smoking status reference group = Non-smoker; non-reference group = Smoker; Vitamin B12 deficiency reference group = Absent; non-reference group = Present; Folic acid supplements reference group = Absent; non-reference group = Present; Type II diabetes reference group = Absent; non-reference group = Present; Depression reference group = Absent; non-reference group = Present; Cognitive decline reference group = Absent; non-reference group = Present; Serum folate deficiency reference group = Absent; non-reference group = Present.

**Supplement Table 5: Sensitivity analyses examining reverse causation**

Adjusted Cox models of the associations between serum folate deficiency and the risks of dementia and all-cause mortality stratified by duration of follow-up

| Serum folate deficiency                  | Dementia         |         | All-cause mortality |         |
|------------------------------------------|------------------|---------|---------------------|---------|
|                                          | HR (95% CI)      | P-value | HR (95% CI)         | P-value |
| Analyzed to median follow-up time        | 1.74 (1.36-2.21) | <0.001  | 3.24 (2.72-3.85)    | <0.001  |
| Analyzed after the median follow-up time | 0.98 (0.46-2.09) | 0.97    | 2.02 (1.29-3.17)    | 0.002   |

Note.

Abbreviations. HR: Hazard Ratio from the Cox regression model, CI: Wald two-sided 95% confidence interval, P-Value: p-value for the test of the hypothesis HR=1 vs the hypothesis HR≠1.

Serum folate deficiency reference group = Absent; non-reference group = Present.

Serum folate deficiency is assumed to be little affected by preclinical dementia when assessed long before dementia onset and considerably affected when assessed nearer the diagnosis. In other words, a stronger association in the first half of follow-up time may suggest that reverse causation is likely. In this case, evidence for reverse causation were moderate for dementia and mild for all-cause mortality.



**Supplement Table 6: Sensitivity analyses examining the effects of possible modifiers**

Adjusted Cox models of the associations between serum folate deficiency and the risks of dementia and all-cause mortality with added interaction terms

| Variable tested in interaction with serum folate deficiency | Dementia          |         | All-cause mortality |         |
|-------------------------------------------------------------|-------------------|---------|---------------------|---------|
|                                                             | HR (95% CI)       | P-value | HR (95% CI)         | P-value |
| Cognitive decline absent                                    | 2.97 (2.49-3.54)  | <.001   | 2.24 (1.69-2.96)    | <.001   |
| Cognitive decline present <sup>1</sup>                      | 3.06 (1.93-4.86)  | <.001   | 1.11 (0.75-1.67)    | 0.60    |
| Depression absent                                           | 3.02 (2.54-3.58)  | <.001   | 1.82 (1.42-2.32)    | <.001   |
| Depression present <sup>1</sup>                             | 2.47 (1.26-4.82)  | <.008   | 0.87 (0.38-1.96)    | 0.73    |
| Type II diabetes absent                                     | 2.79 (2.22-3.5)   | <.001   | 1.93 (1.44-2.57)    | <.001   |
| Type II diabetes present <sup>1</sup>                       | 3.19 (2.54-3.99)  | <.001   | 1.32 (0.88-2.00)    | 0.18    |
| Male sex                                                    | 2.59 (2.11-3.2)   | <.001   | 1.91 (1.42-2.58)    | <.001   |
| Female sex                                                  | 3.73 (2.91-4.78)  | <.001   | 1.42 (0.98-2.08)    | 0.07    |
| Non smoker                                                  | 3.27 (2.71-3.93)  | <.001   | 1.48 (1.11-1.96)    | 0.007   |
| Smoker                                                      | 2.28 (1.65-3.15)  | <.001   | 2.55 (1.63-3.98)    | <.001   |
| Folic acid supplements absent                               | 3.97 (3.3-4.77)   | <.001   | 1.91 (1.46-2.49)    | <.001   |
| Folic acid supplements present <sup>1</sup>                 | 1.58 (1.17-2.14)  | 0.003   | 1.20 (0.74-1.94)    | 0.45    |
| Vitamin B12 deficiency absent                               | 2.69 (0.71-10.20) | 0.14    | 5.74 (1.49-22.20)   | 0.01    |
| Vitamin B12 deficiency present <sup>1</sup>                 | 2.98 (2.52-3.52)  | <.001   | 1.64 (1.29-2.08)    | <.001   |

Note.

Abbreviations:

HR: Hazard Ratio from the Cox regression model, CI: Wald two-sided 95% confidence interval, P-Value: p-value for test of the hypothesis HR=1 vs the hypothesis HR≠1.

<sup>1</sup>Presence at any time point during the follow-up.
